# Supplementary material
Source: PubMed Central journal article supplement (PMC7959644)
Supplement: pnas.2001674117.sapp.pdf [file pnas.2001674117.sapp.pdf]

## Supplementary Information for

### The Contribution of Black Carbon to Global Ice Nucleating Particle Concentrations

Gregory P. Schill, Paul J. DeMott, Ethan W. Emerson, Anne Marie C. Rauker, John K. Kodros, Kaitlyn J. Suski, Thomas C. J. Hill, Ezra J. T. Levin, Jeffrey R. Pierce, Delphine K. Farmer and Sonia M. Kreidenweis

Gregory P. Schill  
E-mail: [gregory.schill@noaa.gov](mailto:gregory.schill@noaa.gov)

#### This PDF file includes:

Figs. S1 to S5  
Tables S1 to S2  
References for SI reference citations

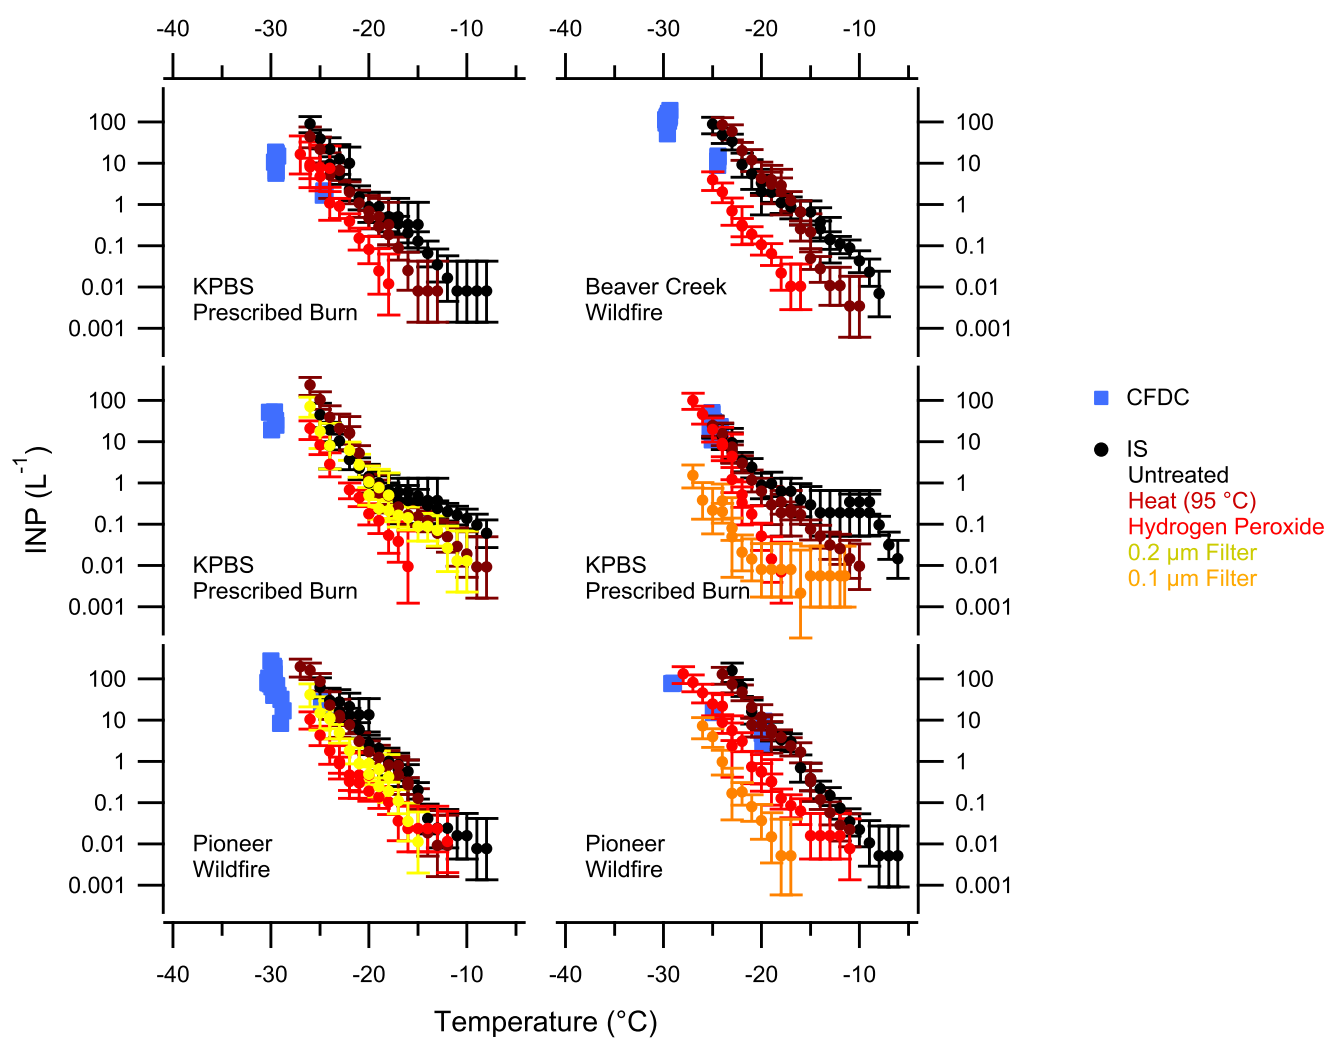

**Fig. S1.** Ice Spectrometer (IS) ice nucleating particle (INP) temperature spectra from Konza Prairie Biological Station (KPBS) prescribed burns and the Beaver Creek and Pioneer Wildfires (Table S1). Also shown are the effect of heat, peroxide, and size exclusion of particles  $> 0.1$  or  $0.2 \mu m$ . Continuous Flow Diffusion Chamber (CFDC) results from the same fire and similar time periods are shown for comparison.

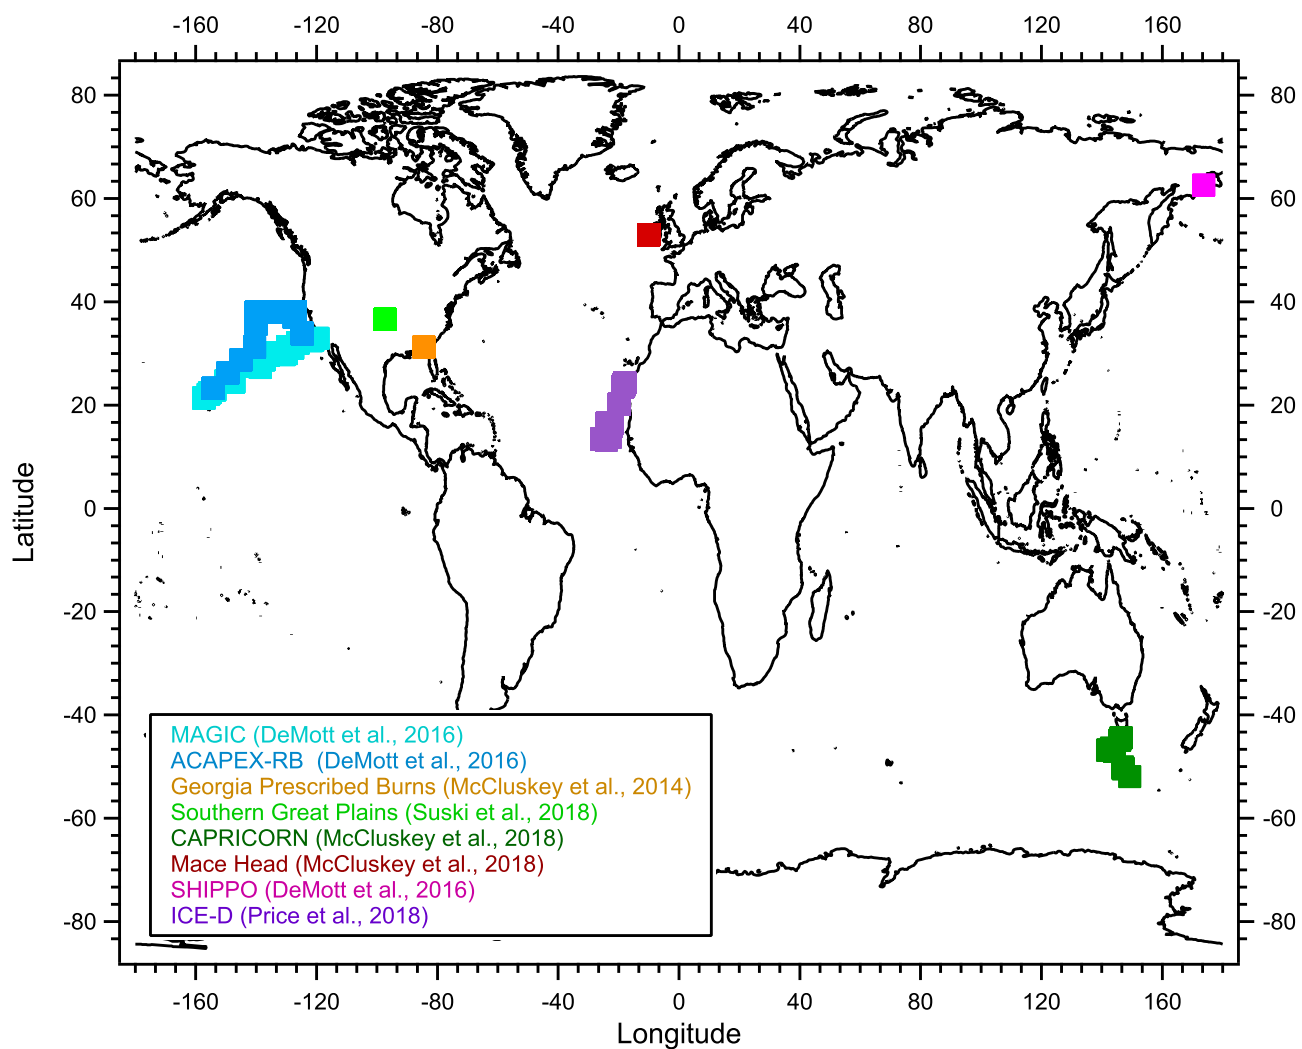

**Fig. S2.** The locations of eight different field studies used to test GEOS-Chem's skill in simulating ice nucleating particle (INP) concentrations. Except for ICE-D, which sampled from an aircraft platform, all other studies sampled near ground-level.

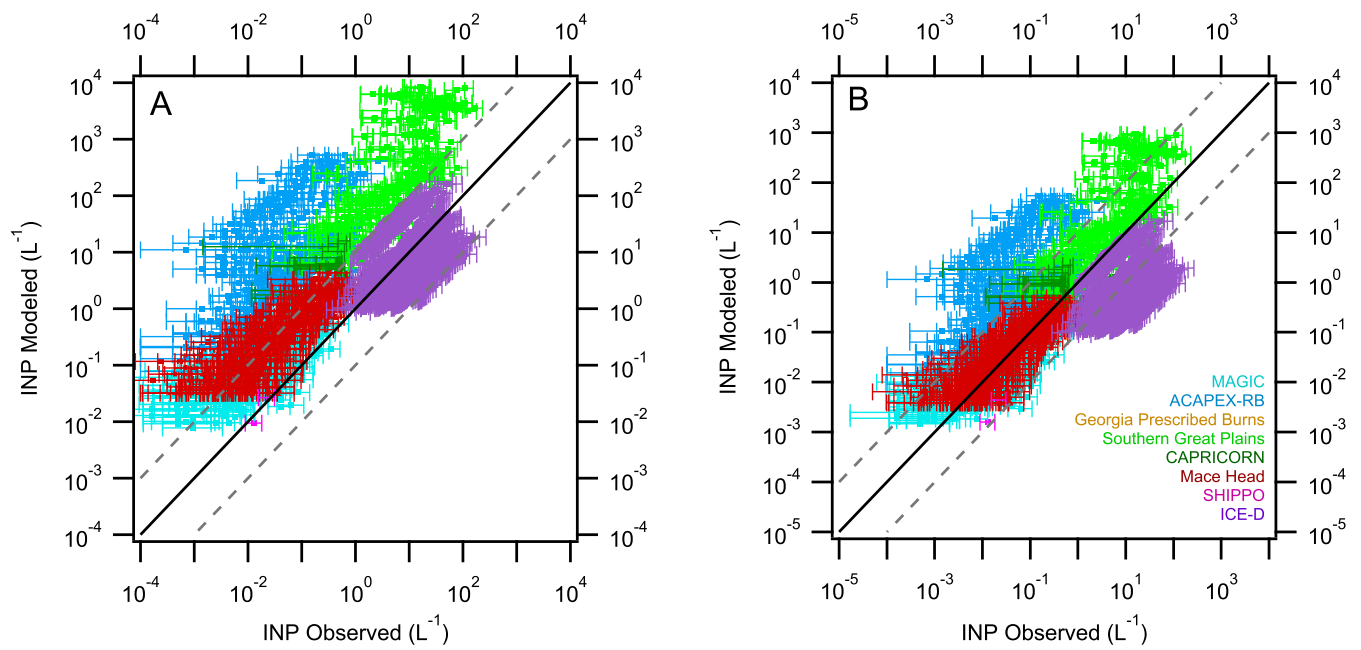

**Fig. S3.** Simulated potential ice nucleating particle (INP) concentrations compared to observations from eight different field studies using (A) the unaltered Niemand et al., (2012) ice nucleation active surface site density ( $n_s$ ) parameterization and (B) the scaled Niemand et al., (2012)  $n_s$  parameterization.

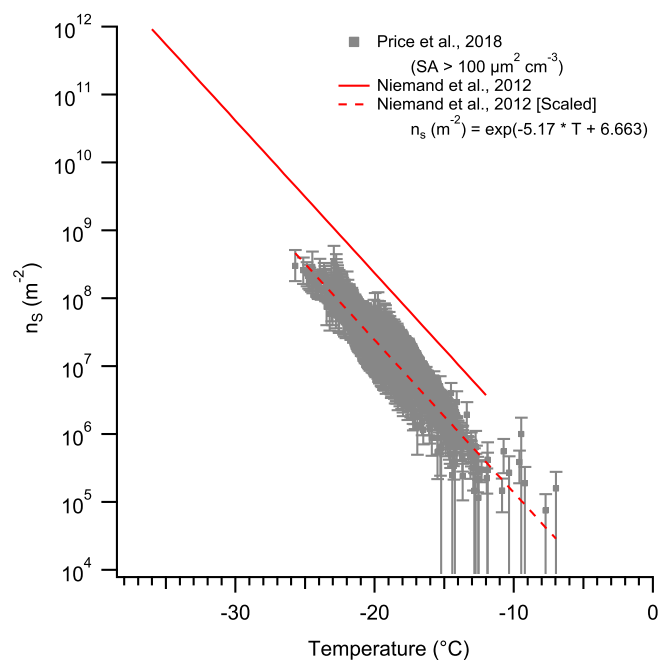

**Fig. S4.** Calculated ice nucleation active surface site density ( $n_s$ ) values from time periods during ICE-D (Price et al., 2018) when aerosol surface area was  $>100 \mu\text{m}^2 \text{cm}^{-3}$ . Also shown are the unaltered and scaled Niemand et al., (2012) parameterizations. The scaled parameterization has the same functional form and slope as the original parameterization.

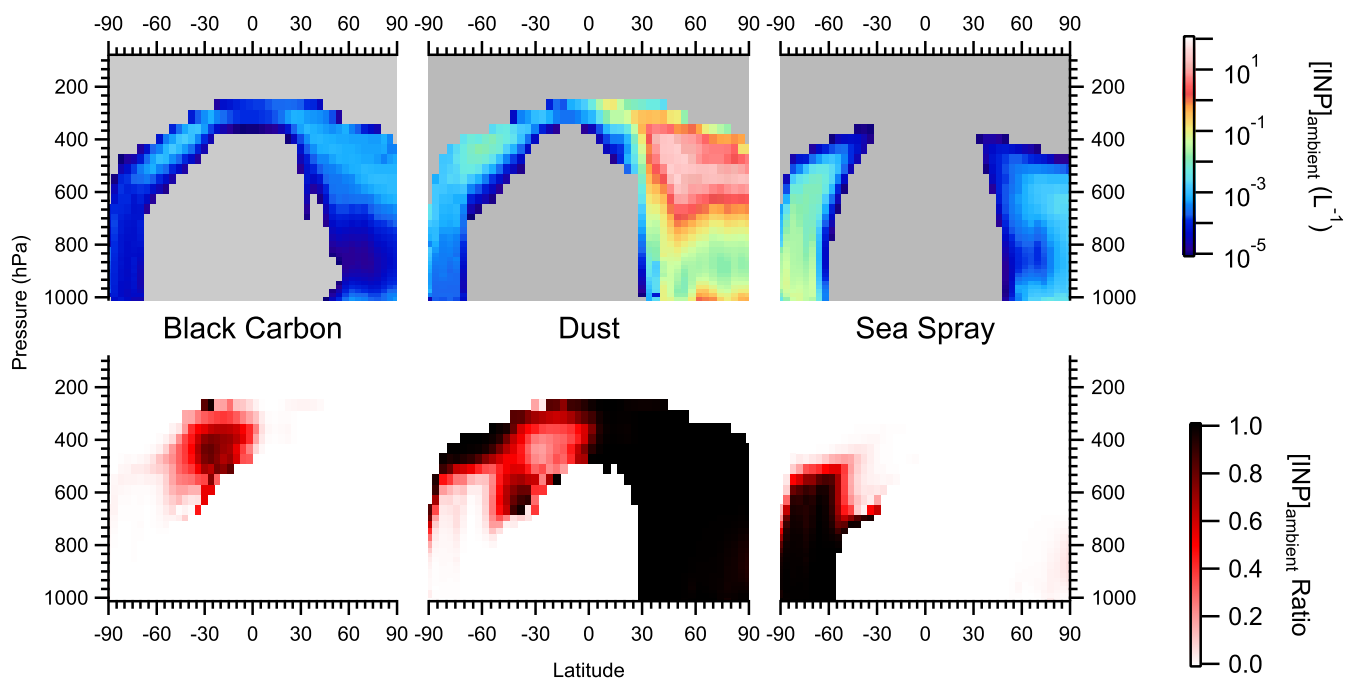

**Fig. S5.** Zonal mean plots of (top row) of simulated potential ice nucleating particle concentrations derived at the models ambient temperature ( $[INP]_{ambient}$ ) for black carbon, dust and sea salt, and (bottom row) the ratio  $[INP]_{ambient}$  to the sum of all simulated  $[INP]_{ambient}$ . Monthly mean temperatures were used for the ice nucleation active surface site density ( $n_s$ ) parameterizations.

**Table S1. Names, dates, GPS locations, proximity to fire, refractory black carbon (rBC) number concentrations, and major fuel types of all fires sampled in this work.**

| Name                          | Date     | GPS Latitude | GPS Longitude | Proximity to Fire | Average rBC Conc.     | Major Fuels                                                                       |
|-------------------------------|----------|--------------|---------------|-------------------|-----------------------|-----------------------------------------------------------------------------------|
| Konza Prairie Prescribed Burn | 20160409 | 39° 06' N    | 96° 36' W     | <3 km             | 207 cm <sup>-3</sup>  | Big Bluestem, Little Bluestem, Switchgrass, and Indian Grass                      |
| Konza Prairie Prescribed Burn | 20190411 | 39° 06' N    | 96° 35' W     | <1 km             | 800 cm <sup>-3</sup>  | Big Bluestem, Little Bluestem, Switchgrass, and Indian Grass                      |
| Konza Prairie Prescribed Burn | 20190412 | 39° 06' N    | 96° 34' W     | <1 km             | 900 cm <sup>-3</sup>  | Big Bluestem, Little Bluestem, Indian Grass, Dogwood, Plum, and Eastern Red Cedar |
| Beaver Creek Fire             | 20160621 | 40° 35' N    | 105° 08' W    | 130 km            | 70 cm <sup>-3</sup>   | Mixed Conifer Forest with Beetle-Kill Pine                                        |
| Cliff Creek Fire              | 20160729 | 43° 09' N    | 110° 18' W    | 20 km             | 26 cm <sup>-3</sup>   | Mixed Conifer Forest with Beetle-Kill Pine                                        |
| Arrowrock Dam                 | 20190820 | 43° 36' N    | 115° 55' W    | 60 km             | 24 cm <sup>-3</sup>   | Ponderosa Pine, Douglas-Fir, Subalpine-Fir and Lodgepole Pine                     |
| Pioneer Fire                  | 20190822 | 44° 03' N    | 96° 34' W     | <1 km             | 1100 cm <sup>-3</sup> | Ponderosa Pine, Douglas-Fir, Subalpine-Fir and Lodgepole Pine                     |
| Pioneer Fire                  | 20190823 | 44° 03' N    | 115° 48' W    | <1 km             | 1100 cm <sup>-3</sup> | Ponderosa Pine, Douglas-Fir, Subalpine-Fir and Lodgepole Pine                     |

**Table S2. The fraction of black carbon (BC) ice nucleating particles (INP) relative to total aerosol counts (low/high of total range) during FLAME-4, southeastern U.S. prescribed burns, and this study.**

| Reference              | Burn Type                      | Location     | BC INP Fraction Low  | BC INP Fraction High |
|------------------------|--------------------------------|--------------|----------------------|----------------------|
| Levin et al. 2016      | Laboratory Burns               | FLAME-4      | $3.3 \times 10^{-8}$ | $6.1 \times 10^{-8}$ |
| McCluskey et al. 2014* | Prescribed Burns               | Georgia, USA | $1.2 \times 10^{-9}$ | $3.0 \times 10^{-6}$ |
| This Study             | Prescribed Burns and Wildfires | See Table S1 | $3.1 \times 10^{-9}$ | $6.2 \times 10^{-7}$ |

\* Assumes 64% of INP were BC



## References

1. DeMott PJ, et al. (2016) Sea spray aerosol as a unique source of ice nucleating particles. *Proceedings of the National Academy of Sciences* 113(21):5797–5803.
2. McCluskey CS, et al. (2014) Characteristics of atmospheric ice nucleating particles associated with biomass burning in the US: Prescribed burns and wildfires. *Journal of Geophysical Research: Atmospheres* 119(17):10458–10470.
3. Suski KJ, et al. (2018) Agricultural harvesting emissions of ice-nucleating particles. *Atmospheric Chemistry and Physics* 18(18):13755–13771.
4. McCluskey CS, et al. (2018) Observations of Ice Nucleating Particles Over Southern Ocean Waters. *Geophysical Research Letters* 45(21):11,989–11,997.
5. McCluskey CS, et al. (2018) Marine and Terrestrial Organic Ice-Nucleating Particles in Pristine Marine to Continentally Influenced Northeast Atlantic Air Masses. *Journal of Geophysical Research: Atmospheres* 123(11):6196–6212.
6. Price HC, et al. (2018) Atmospheric Ice-Nucleating Particles in the Dusty Tropical Atlantic. *Journal of Geophysical Research: Atmospheres* 123(4):2175–2193.
